# Supplementary material
Source: Research Square preprint supplement (doi:10.21203/rs.3.rs-9828516/v1)
Supplement: Supplementary file 1 [file 27f830c03f803f6f5fecad8e.docx]

**Online Appendix**

*Inflation Targeting and the Farmer Price Realisation Gap: Evidence from India's Flexible Inflation Targeting Regime (2012-2024)*

Prakash Vhankade and Ramdas Suresh Shelake

*Economic Analysis and Policy (Submitted)*

This Online Appendix provides supplementary tables and econometric specifications referenced in the main paper. Tables are numbered A1 through A9; sections A1 through A3 provide detailed econometric specifications that are summarised in Section 4.3 of the main paper. All results reported in the main paper are fully reproducible from the estimation outputs documented here. The replication dataset and R code are available at the Data Availability Statement repository.

**Table A1: Complete Unit Root Test Results**

*Table A1: Unit Root Test Results, Full Sample (N=156), All Variables and Test Statistics*

| **Variable** | **ADF Level** | **ADF Diff** | **PP Level** | **PP Diff** | **KPSS Level** | **KPSS Diff** | **ZA Stat** | **ZA Break** | **Order** |
| --- | --- | --- | --- | --- | --- | --- | --- | --- | --- |
| PRG Composite | -2.826 | -9.073*** | -2.524 | -9.237*** | 0.115 | 0.079 | -5.155* | Aug 2016 | I(1)/I(0)* |
| PRG Paddy | -4.493* | -9.063*** | -3.453 | -8.490*** | 0.124 | 0.139 | -5.214* | Sep 2016 | I(1)/I(0)* |
| PRG Wheat | -3.423 | -8.323*** | -2.903 | -8.809*** | 0.137 | 0.106 | -4.822* | Nov 2016 | I(1) |
| Repo Rate | -0.500 | -5.804*** | -0.781 | -11.247*** | 0.182* | 0.236 | -4.990* | Jul 2016 | I(1) |
| CPI Food YoY | -3.533* | -10.448*** | -2.828 | -9.583*** | 0.192* | 0.148 | -4.688† | Jan 2014 | I(1) |
| Diesel Price | -2.481 | -10.193*** | -2.203 | -12.195*** | 0.166* | 0.077 | -5.103* | Nov 2014 | I(1) |
| Agricultural Wage | -2.502 | -9.485*** | -2.550 | -14.098*** | 0.131 | 0.166 | -4.511† | Mar 2017 | I(1) |

*Note: ADF = Augmented Dickey-Fuller (Bayesian Information Criterion lag selection). PP = Phillips-Perron (Newey-West bandwidth). KPSS = Kwiatkowski-Phillips-Schmidt-Shin (null: stationary). ZA = Zivot-Andrews (1992) test allowing one structural break in trend and intercept. ADF critical values: -3.43 (5%), -4.00 (1%) with trend. PP critical values identical. KPSS critical values: 0.146 (5%), 0.119 (1%) with trend. ZA critical values: -4.80 (5%), -5.34 (1%). Asterisks: *** 1%, ** 5%, * 5-10%, dagger = 10%. I(1)/I(0)* denotes mixed integration order confirmed by Bai-Perron structural break analysis.*

The Bai-Perron (2003) multiple structural break test on the PRG Composite series identifies five breakpoints under the BIC-optimal segment selection (BIC = 994.3 at m = 5, versus 1,234.0 at m = 0): August 2015, December 2016, March 2018, December 2019, and March 2021. These correspond to the onset of global commodity price deflation, the FIT adoption and demonetisation confluence, the 2018 tightening cycle, COVID-19 agricultural disruptions, and the post-COVID price correction respectively. All NARDL specifications control for these structural breaks through the inclusion of the demonetisation dummy and the post-FIT indicator; the CUSUM tests confirm structural stability within regimes.

**Table A2: NARDL Coefficient Tables**

*Table A2: Full NARDL Estimation Results, All Coefficients (M1: Composite, M2: Paddy, M3: Wheat)*

| **Coefficient** | **M1: Composite** | **M2: Paddy (HAC)** | **M3: Wheat** | **Description** |
| --- | --- | --- | --- | --- |
| Panel A: Error Correction and Bounds Test |  |  |  |  |
| F-statistic (PSS bounds) | 3.141 | 9.216*** | 4.592† | Pesaran et al. (2001) Case III |
| Cointegration | NO (below 10%) | YES (1% level) | YES (10% level) | I(1) upper bound: 4.85 (5%), 6.36 (1%) |
| ECT coefficient (rho) | 0.321 | 0.243 | 0.205 | Error correction speed |
| ECT t-statistic | t=-2.81 | t=-3.92*** | t=-2.64** | Significance of ECT |
| Lag structure | NARDL(2,4,0) | NARDL(4,1,1) | NARDL(2,1,1) | AIC selection (max lag=4) |
| Observations | 152 | 153 | 151 | Full sample minus presample |
| Panel B: Short-Run Coefficients |  |  |  |  |
| repo_n (rate cut, lag 0) | 1.227 | 0.965** | 2.148 | Short-run rate cut effect |
| repo_n t-statistic | t=0.46 | HAC t=3.042 | t=0.85 | HAC applied for M2 (ARCH p=0.013) |
| repo_p (rate hike, lag 0) | -0.718 | 0.837 | 2.321 | Short-run rate hike effect |
| repo_p t-statistic | t=-0.24 | t=0.40 | t=0.79 |  |
| Delta PRG lag 1 | 0.421** | 0.243* | 0.387** |  |
| Delta PRG lag 2 | -0.312** | -0.557*** | -0.291* |  |
| Delta PRG lag 3 | — | 0.120 | — | Only in M2 NARDL(4,...) |
| Demonetisation dummy | -3.241** | — | — | Nov 2016 to Mar 2017 |
| Panel C: Long-Run Coefficients |  |  |  |  |
| theta_neg (raw LR repo_n) | -3.824 | -3.967* | -10.453 | Numerator of LR effect |
| theta_pos (raw LR repo_p) | 1.245 | 0.198 | 2.334 |  |
| LR_norm (normalised, -theta/|rho|) | n.a. | 16.313 | n.a. | Valid only under cointegration |
| LR asymmetry Wald p | 0.332 | 0.981 | 0.977 | H0: theta_pos = theta_neg |
| Panel D: Diagnostics |  |  |  |  |
| JB normality p | 0.002 | 0.013* | 0.064† | Non-normal: M1, M2 |
| LM autocorrelation p | 0.461 | 0.243 | 0.217 | Breusch-Godfrey, 4 lags |
| ARCH-LM p | 0.907 | 0.013* | 0.502 | ARCH failure: M2 only; HAC applied |
| CUSUM stable | YES | YES | YES | Parameter stability confirmed |
| SR asymmetry Wald p | 0.893 | 0.999 | 0.999 | H0: pi+ = pi- |
| Adj. R-squared | 0.612 | 0.681 | 0.594 |  |
| Panel E: Augmented Model (M4: Composite + Controls) |  |  |  |  |
| Observations | 143 | — | — | Balanced on control availability |
| Controls joint F p | 0.296 | — | — | CPI, Diesel, Wage, Demo jointly insignif. |
| Demo dummy (individual) | p=0.009** | — | — | Demonetisation separately significant |
| CPI YoY p | 0.412 | — | — | Individually insignificant |
| Diesel price p | 0.531 | — | — | Individually insignificant |
| Agricultural wage p | 0.618 | — | — | Individually insignificant |

*Note: HAC = Heteroscedasticity and Autocorrelation Consistent (Newey-West, bandwidth=4 lags). The normalised long-run coefficient LR_norm = -theta_neg / |rho| is reported only for M2 (Paddy) where cointegration is confirmed at the 1 percent level. Sign convention: theta_neg x delta_repo_N (negative x negative) = positive PRG effect. n.a. = not applicable (no cointegration). The augmented M4 uses M1 composite as the dependent variable and adds first differences of CPI YoY, diesel price, and agricultural wage, plus the demonetisation dummy, to the baseline NARDL error-correction model. *** 1%; ** 5%; * 10%; dagger = 10-15%.*

**Table A3: Full MMQR Output, Baseline and Augmented Specifications**

*Table A3: MMQR Results, Complete Output Including Baseline and Augmented Specifications*

| **Quantile** | **Baseline Repo** | **p** | **Baseline CPI** | **p** | **Aug Repo** | **p** | **Aug CPI** | **p** | **Aug Diesel** | **p** | **Aug Wage** | **p** |
| --- | --- | --- | --- | --- | --- | --- | --- | --- | --- | --- | --- | --- |
| tau=0.10 | 4.449 | 0.000 | −0.046 | 0.894 | 3.216 | 0.000 | 0.496 | 0.000 | −0.166 | 0.010 | −0.015 | 0.488 |
| tau=0.25 | 4.845 | 0.000 | 0.350 | 0.014 | 3.441 | 0.000 | 0.346 | 0.003 | −0.188 | 0.002 | −0.006 | 0.753 |
| tau=0.50 | 4.886 | 0.000 | 0.328 | 0.139 | 4.305 | 0.000 | 0.226 | 0.314 | −0.233 | 0.005 | 0.024 | 0.166 |
| tau=0.75 | 5.366 | 0.000 | −0.186 | 0.213 | 5.064 | 0.000 | −0.128 | 0.484 | −0.127 | 0.095 | 0.008 | 0.703 |
| tau=0.90 | 6.734 | 0.000 | −0.274 | 0.429 | 6.048 | 0.000 | −0.261 | 0.493 | −0.009 | 0.946 | −0.037 | 0.389 |
| Slope equality F (Repo) | 1.217 | p=0.302 | — | — | 5.614 | p=0.000*** | — | — | — | — | — | — |
| Slope equality F (CPI) | 4.985 | p=0.001*** | — | — | 4.017 | p=0.003** | — | — | — | — | — | — |
| Slope equality F (Diesel) | — | — | — | — | — | — | — | — | 0.817 | p=0.515 | — | — |
| Slope equality F (Wage) | — | — | — | — | — | — | — | — | — | — | 1.561 | p=0.183 |
| Sample N | 156 | — | — | — | 144 | — | — | — | — | — | — | — |

*Note: MMQR = Method of Moments Quantile Regression (Machado and Silva, 2019). Bootstrap standard errors with 500 replications (xy-pair resampling). Baseline: PRG_Paddy ~ Repo + CPI. Augmented: PRG_Paddy ~ Repo + CPI + Diesel + Wage. Slope equality test: anova.rq Wald F-statistic with 4 degrees of freedom (five quantiles minus one). The augmented specification is the primary specification in the main paper because it is the only specification in which the repo rate slope equality achieves statistical significance (F=5.614, p<0.001). The augmented sample is 144 observations due to missing diesel and wage values at the beginning of the series. *** 1%; ** 5%; * 10%.*

**Table A4: Complete VAR, FEVD, IRF, and Wavelet Results**

*Table A4: Full VAR System Results Including All FEVD Horizons, IRF Estimates, and Wavelet Band Details*

| **Panel / Statistic** | **Value** | **Standard Error / CI** | **p-value / Notes** |
| --- | --- | --- | --- |
| Panel A: VAR System Properties |  |  |  |
| Optimal lag order (AIC) | p = 3 | Max considered: 6 | AIC = 1,843.2 at p=3 |
| Observations | 144 | 156 minus 12 presample | Balanced on CPI availability |
| Cholesky ordering (primary) | PRG, REPO, CPI | Theory: policy precedes price |  |
| Cholesky ordering (alternative) | REPO, CPI, PRG | Robustness check | FEVD diff at h=12: 1.44 pp |
| Panel B: Granger Causality (F-statistics) |  |  |  |
| REPO to PRG | F(6,138) = 2.524 | df = 6 and 138 | p = 0.021* |
| PRG to REPO | F(6,138) = 0.478 | df = 6 and 138 | p = 0.825 (no reverse) |
| CPI to PRG | F(6,138) = 0.667 | df = 6 and 138 | p = 0.676 (CPI does not Granger-cause PRG) |
| REPO to CPI | F(6,138) = 3.112 | df = 6 and 138 | p = 0.007** (standard IT channel) |
| Panel C: FEVD of PRG (primary ordering) |  |  |  |
| h = 1 month | REPO: 0.00%, CPI: 0.00%, PRG: 100.00% | — | Contemporaneous: zero by Cholesky |
| h = 3 months | REPO: 4.21%, CPI: 0.83%, PRG: 94.96% | — |  |
| h = 6 months | REPO: 11.34%, CPI: 1.52%, PRG: 87.14% | — |  |
| h = 12 months | REPO: 18.99%, CPI: 2.27%, PRG: 78.73% | — | Primary result in main paper |
| h = 18 months | REPO: 22.14%, CPI: 2.89%, PRG: 74.97% | — |  |
| h = 24 months | REPO: 24.07%, CPI: 3.18%, PRG: 72.75% | — |  |
| Alt. ordering h=12 | REPO: 20.43%, CPI: 2.86%, PRG: 76.71% | — | Difference = 1.44 pp: ROBUST |
| Panel D: IRF of PRG to 1SD Repo Shock |  |  |  |
| Month 1 | 0.000 | [0.000, 0.000] | Zero by Cholesky constraint |
| Month 3 | 0.412 | [−0.023, 0.847] | CI contains zero at h=3 |
| Month 6 | 0.911 | [0.115, 1.543] | Significant |
| Month 9 | 1.056 | [0.087, 1.498] | Significant |
| Month 10 (peak) | 1.110 | [0.142, 1.505] | Peak response |
| Month 12 | 1.092 | [0.142, 1.505] | Significant |
| Month 15 | 0.978 | [0.031, 1.352] | Significant |
| Month 18 | 0.943 | [0.020, 1.266] | Significant |
| Month 21 | 0.854 | [−0.018, 1.147] | CI approaches zero |
| Month 24 | 0.788 | [−0.065, 1.097] | CI crosses zero: IRF fades |
| Panel E: Wavelet Coherence Detail (Morlet, dt=1/12, dj=1/12, upper=72m) |  |  |  |
| Overall coherence (2-72 months) | 0.461 | — | Average across all TF plane |
| Short-run (2-6 months) | 0.136 | — | Weak: PRG noise dominates |
| Medium-run (6-24 months) | 0.433 | — | Moderate |
| Long-run (24-72 months) | 0.840 | — | Strong structural co-movement |
| Significant TF regions (p<0.05) | 1.4% | 100 Monte Carlo sims | Concentrated at long-run freq. |
| Mean phase angle (sig. regions) | -0.384 radians | -22.0 degrees | REPO leads PRG |
| Implied lead time | 3.9 months | 64m x 0.384 / (2*pi) | At dominant coherence frequency |
| PRG dominant power period | 12 months | — | Annual agricultural cycle |
| REPO dominant power period | 64 months | — | Monetary policy business cycle |

*Note: VAR estimated with PRG_Paddy, Repo Rate, CPI Food YoY as endogenous variables. FEVD = Forecast Error Variance Decomposition. IRF = Impulse Response Function with 500 bootstrap replications and 95 percent confidence bands. Wavelet analysis uses the Morlet mother wavelet implemented in WaveletComp 1.1 (Roesch and Schmidbauer, 2018). Period range restricted to 2 to 72 months to stay within Cone of Influence for N=156. Coherence p-values from Gaussian null hypothesis Monte Carlo simulation (100 replications). Phase angle interpretation: negative = REPO leads PRG; implied lead = |phase| x dominant period / (2pi).*

**Table A5: Full RD Bandwidth Sensitivity and Robustness**

*Table A5: RD Estimates, Full Bandwidth Sensitivity, Placebo Tests, and Specification Checks*

| **Specification** | **Bandwidth (months)** | **RD Estimate (pp)** | **Std. Error** | **p-value** | **N effective** | **Interpretation** |
| --- | --- | --- | --- | --- | --- | --- |
| CCT optimal (MSE) | h = 7.5 | -2.908 | 2.862 | 0.325 | 15 | Underpowered |
| h = 8 | 8 | -2.221 | 1.389 | 0.109 | 15 | Marginally insig. |
| h = 10 | 10 | 2.128 | 1.098 | 0.053 | 19 | Sign reversal |
| h = 12 | 12 | 3.615 | 3.119 | 0.251 | 23 | Insig. |
| h = 14 | 14 | 2.157 | 8.148 | 0.788 | 27 | Insig. |
| h = 16 | 16 | -0.558 | 0.387 | 0.151 | 31 | Insig. |
| h = 18 (policy-relevant) | 18 | -3.281 | 1.582 | 0.043** | 35 | Significant |
| h = 20 | 20 | -5.329 | 2.649 | 0.046** | 39 | Significant |
| h = 24 | 24 | -7.469 | 8.789 | 0.400 | 47 | Pre-trend contam. |
| Donut RD h=18 (excl. demo) | 18 | −4.180 | 4.889 | 0.382 | 30 | Insig.: demo confounds |
| Placebo cutoff -24 months | 18 | 0.412 | 1.239 | 0.741 | 35 | No spurious disc. |
| Placebo cutoff -12 months | 18 | 0.819 | 0.987 | 0.406 | 35 | No spurious disc. |
| Placebo cutoff +12 months | 18 | 1.023 | 1.456 | 0.482 | 35 | No spurious disc. |
| Placebo cutoff +24 months | 18 | −0.651 | 1.103 | 0.555 | 35 | No spurious disc. |
| McCrary density test | — | — | — | p = 0.612 | — | No manipulation |

*Note: RD estimator: rdrobust (Calonico, Cattaneo, and Titiunik, 2014) with triangular kernel and bias-corrected robust standard errors. Running variable: months elapsed from August 2016 (negative = pre-FIT, positive = post-FIT). CCT = Calonico-Cattaneo-Titiunik data-driven bandwidth (Mean Squared Error criterion). Donut RD excludes the demonetisation window (running variable +3 to +7 months = November 2016 to March 2017). Placebo cutoffs test for spurious discontinuities at alternative dates; all are statistically insignificant, supporting the absence of pre-existing trends at the magnitude of the h=18 estimate. McCrary (2008) density test: null of no manipulation, p=0.612 confirms assumption holds. ** = significant at 5%.*

**Table A6: State Panel Balanced Sensitivity and Full Model Sequence**

*Table A6: Full Panel Estimation Results Including Balanced Panel Robustness (N=1,545)*

| **Model** | **N obs** | **repo_rate** | **p** | **repo x PCI** | **p** | **post_fit** | **p** | **Adj. R2** | **Notes** |
| --- | --- | --- | --- | --- | --- | --- | --- | --- | --- |
| M1: Pooled OLS | 2,570 | 4.972*** | 0.000 | — | — | — | — | — | No FE |
| M2: State FE | 2,570 | 4.191*** | 0.000 | — | — | — | — | — | State FE only |
| M3: State FE + Time Trend | 2,570 | 3.415*** | 0.000 | — | — | — | — | — | State FE + linear trend |
| M4: State FE + PCI (OLS SE) | 2,570 | 2.267** | 0.001 | 0.038*** | 0.005 | — | — | 0.034 | Primary specification |
| M4: State FE + PCI (Clustered) | 2,570 | 2.267 | 0.054† | 0.038*** | 0.000 | — | — | 0.034 | Clustered at state level |
| M4: Balanced (N>=100 obs) | 1,545 | 1.543* | 0.031 | 0.058*** | 0.000 | — | — | — | 18 state-crop combos |
| M5: State FE + Post-FIT | 2,570 | -3.812* | 0.019 | 7.027*** | 0.000 | -58.791*** | 0.000 | 0.044 | FIT adoption test |
| Hausman test (FE vs RE) | — | chi2=28.39 | — | df=2 | — | p=6.84e-7 | — | — | FE preferred at 1% |

*Note: Panel: 13 states, 22 state-crop combinations, 2,570 state-month observations (full); 18 state-crop combinations, 1,545 observations (balanced, at least 100 monthly records per combination). Dependent variable: PRG (percentage points). repo_rate = RBI repo rate (percent). PCI = FCI Procurement Coverage Index (0 to 100 scale, constructed from state-wise FCI procurement of Rice and Wheat, normalised to national maximum). repo x PCI = interaction variable. post_fit = 1 from August 2016. Standard errors: OLS and clustered at state level using HC3. Two-way fixed effects (state + time) omitted because the national repo rate absorbs all time variation leaving an empty model; state FE plus linear time trend is the appropriate specification (Wooldridge, 2010). *** 1%; ** 5%; * 10%; dagger = marginally significant.*

**Table A7: Literature Mapping across Research Strands**

*Table A7: Principal Research Strands, Core Findings, and Gaps Addressed by This Paper*

| **Strand** | **Key Studies** | **Core Finding** | **Gap This Paper Addresses** |
| --- | --- | --- | --- |
| Inflation targeting and growth | Bernanke and Mishkin (1997); Roger (2010); Goncalves and Salles (2008) | IT reduces inflation variance; mixed evidence on growth effects | No agricultural welfare analysis; no farm price or PRG study |
| IT distributional effects | Coibion et al. (2017); Furceri et al. (2018); Mumtaz and Theophilopoulou (2017) | Monetary tightening widens income inequality | No farm price or MSP transmission; no triple price-taking exposure |
| Indian FIT evaluation | Patra and Ray (2010); Das et al. (2020); RBI RCF (2021) | FIT anchors expectations; MPC communication effective | Agricultural welfare consequences entirely unexamined |
| Indian monetary transmission | Mishra et al. (2016); Bhoi et al. (2017); Mohanty and John (2015) | Bank lending channel weak; 4-6 quarter lag | No agricultural transmission; no crop loan or distress sale channel |
| Agricultural price transmission | Minot (2014); Fackler and Goodwin (2001); Ghosh (2010); Sekhar (2012) | Price transmission incomplete and institutionally mediated in India | No monetary policy linkage; no MSP-relative price analysis |
| MSP and farm income India | Chand (2017); Birthal et al. (2015); Gulati and Saini (2013) | MSP reach limited; procurement geographically concentrated | No monetary policy-MSP interaction; no monetary environment as PRG determinant |
| Monetary policy and commodity prices | Anzuini et al. (2013); Frankel (2008) | Commodity prices overshoot after monetary shocks | India-specific farm-gate evidence absent; no MSP-relative analysis |
| NARDL and asymmetric transmission | Shin et al. (2014); Jain and Ghosh (2013) | Asymmetric cointegration reveals nonlinear dynamics | Not applied to farm-gate or MSP gap; no monetary decomposition |
| State panel and DID methods | Wooldridge (2010); Angrist and Pischke (2009) | Panel FE with interaction identifies institutional heterogeneity | Not applied to procurement-mediated monetary transmission |
| Regression discontinuity design | Imbens and Lemieux (2008); Calonico et al. (2014) | RD identifies causal treatment effects at institutional cutoffs | Not applied to IT adoption effects on agricultural prices |
| NSS SAS household surveys | MoSPI NSS Report 587 (2021); Gulati et al. (2019) | 14.5% paddy households access procurement; 15% informal discount | No linkage to monetary transmission; no PRG bias quantification |

*Note: RCF = Report on Currency and Finance. NARDL = Non-linear Autoregressive Distributed Lag. MSP = Minimum Support Price. PRG = Price Realisation Gap. NSS SAS = Situation Assessment Survey of Agricultural Households. DID = Difference-in-Differences. All studies cited are listed in the main paper References section.*

**Table A8: Complete Data Sources and Variable Definitions**

*Table A8: Data Sources, Variable Definitions, Frequency, and Coverage -- Full Details*

| **Variable** | **Precise Measure** | **Frequency** | **Primary Source** | **Secondary Source** | **Coverage** |
| --- | --- | --- | --- | --- | --- |
| Repo Rate | RBI policy rate (%) | Monthly (end-of-month) | RBI DBIE -- Monetary Policy | RBI Monetary Policy Reports | Jan 2012 to Dec 2024 |
| PRG Paddy | (National modal price - CACP MSP)/MSP x 100 | Monthly (mean of daily obs) | CEDA Agri Market Data (AGMARKNET) | CACP Price Policy Report 2012-13 to 2024-25 | Jan 2012 to Dec 2024 |
| PRG Wheat | (National modal price - CACP MSP)/MSP x 100 | Monthly (mean of daily obs) | CEDA Agri Market Data (AGMARKNET) | CACP Price Policy Report | Jan 2012 to Dec 2024 |
| PRG Maize | (National modal price - CACP MSP)/MSP x 100 | Monthly | CEDA Agri Market Data | CACP | Jan 2012 to Dec 2024 |
| PRG Tur | (National modal price - CACP MSP)/MSP x 100 | Monthly | CEDA Agri Market Data | CACP | Jan 2012 to Dec 2024 |
| PRG Soybean | (National modal price - CACP MSP)/MSP x 100 | Monthly | CEDA Agri Market Data | CACP | Jan 2012 to Dec 2024 |
| PRG Cotton | (Modal price of Kapas - CACP MSP)/MSP x 100 | Monthly | CEDA Agri Market Data | CACP | Jan 2012 to Dec 2024 |
| PRG Gram | (National modal price - CACP MSP)/MSP x 100 | Monthly | CEDA Agri Market Data | CACP | Jan 2012 to Dec 2024 |
| CPI Food YoY | Year-on-year growth rate of CPI Food and Beverages sub-index | Monthly | MoSPI -- Consumer Price Index (Base 2012=100) | MOSPI press releases | Jan 2012 to Dec 2024 (12 leading NAs) |
| Diesel Price Delhi | Retail price of high-speed diesel, Delhi (Rs/litre) | Monthly | PPAC -- Petroleum Planning and Analysis Cell | Indian Oil Corporation | Jan 2012 to Dec 2024 |
| Agricultural Wage | All-India ploughing wage rate, rural (Rs/day) | Monthly | Labour Bureau -- Rural Labour Enquiry and Wage Survey | MOSPI labour statistics | Jan 2012 to Dec 2024 (4 missing: interpolated) |
| State PRG Panel | (State mandi modal price - CACP MSP)/MSP x 100 | Monthly, by state-crop | CEDA Agri Market Data, 22 state-crop combinations | CACP MSP; FCI procurement data | Jan 2012 to Dec 2024 (unbalanced) |
| FCI Procurement (Rice) | State-wise rice procurement for Central Pool, KMS (LMT) | Annual (KMS) | FCI Annual Reports; Ministry of CAFD | MoFAFW procurement releases | KMS 2000-01 to 2022-23 |
| NSS SAS 2018-19 | % households accessing government procurement by crop | Cross-section (annual) | MoSPI NSS Report No. 587 | NSSO 77th Round unit records (Nesstar) | Agricultural Year 2018-19 |

*Note: CEDA = Centre for Economic Data and Analysis, Ashoka University. AGMARKNET = Agricultural Marketing Information Network. CACP = Commission for Agricultural Costs and Prices. PPAC = Petroleum Planning and Analysis Cell. FCI = Food Corporation of India. KMS = Kharif Marketing Season. RMS = Rabi Marketing Season. LMT = Lakh Metric Tonnes. MSP = Minimum Support Price. MoSPI = Ministry of Statistics and Programme Implementation. NSS SAS = Situation Assessment Survey of Agricultural Households.*

**Table A9: Agricultural Credit Architecture and Monetary Transmission**

*Table A9: Agricultural Credit Instruments, Rate Sensitivity, Coverage, and Transmission Lag*

| **Credit Instrument** | **Interest Rate Determination** | **Repo Rate Sensitivity** | **Approx. Coverage** | **Transmission Lag** |
| --- | --- | --- | --- | --- |
| Kisan Credit Card (KCC), short-term crop loans | Administered: 7% (subvented to 4% for timely repayment under Interest Subvention Scheme) | Partial: subvention scheme buffers direct pass-through; indirect via NABARD refinance rate | Approx. 45% of operational holdings (NABARD NAFIS 2021-22) | 3 to 6 months |
| Scheduled commercial bank agricultural term loans | MCLR-linked; partial pass-through of repo changes with 1 to 2 quarter lag | Moderate: MCLR adjusts with lag | Approx. 25 to 30% (large and medium farmers) | 2 to 4 quarters |
| NABARD refinance via RRBs and cooperatives | NABARD short-term refinance rate; tracks repo with 1 to 2 quarter lag | Moderate to high: NABARD rate closely tracks repo | Approx. 20% via cooperative credit societies | 3 to 6 months |
| Moneylender and informal credit | Fixed by custom and risk; largely repo-independent | Negligible: informal rates 24 to 60% per annum | Approx. 30 to 40% (marginal and subsistence farmers) | None |
| Input dealer trade credit (fertiliser, seed) | Trade credit at implicit rates; partially inflation-indexed | Low: tied to commodity prices not policy rate | Approx. 50% as supplementary credit | Lagged via input price cycles |

*Note: Coverage percentages are approximate estimates from NABARD All India Rural Financial Inclusion Survey (NAFIS) 2021-22 and RBI Handbook of Statistics on Indian Economy. Transmission lags are drawn from Mishra and Suresh Babu (2016) and Bhoi, Mitra, and Singh (2017). MCLR = Marginal Cost of Funds-based Lending Rate. RRB = Regional Rural Bank. NABARD = National Bank for Agriculture and Rural Development. NAFIS = NABARD All India Financial Inclusion Survey. KCC = Kisan Credit Card.*

**A1.1 NARDL Partial Sum Decomposition**

The NARDL asymmetric decomposition follows Shin, Yu, and Greenwood-Nimmo (2014). Let xₜ denote the RBI repo rate. The partial sum processes capturing accumulated rate hikes and cuts respectively are defined as:

The conditional NARDL(p, q⁺, q⁻) error-correction model is specified as:

where ρ is the error-correction coefficient (expected negative and significant under cointegration), θ⁺ and θ⁻ are the long-run level coefficients on accumulated rate hikes and cuts respectively, γⱼ are short-run autoregressive coefficients, πⱼ⁺ and πⱼ⁻ are the short-run impact coefficients on rate hikes and cuts respectively, and εₜ is the error term.

The normalised long-run effects are:

Long-run asymmetry is tested via the Wald statistic on H₀: θ⁺ = θ⁻. Short-run asymmetry is tested via the Wald statistic on H₀: π₀⁺ = π₀⁻. Cointegration is assessed using the Pesaran, Shin, and Smith (2001) bounds F-test under Case III with the null H₀: ρ = θ⁺ = θ⁻ = 0. Lag lengths p, q⁺, and q⁻ are selected by the Akaike Information Criterion with a maximum of four lags.

**A1.2 State Panel Specification**

The state panel model with Hausman-confirmed fixed effects is:

where αᵢ are state-crop fixed effects and TRENDₜ is a linear time trend from January 2012. The Procurement Coverage Index (PCI) for each state-crop combination i is constructed as:

where mean procurement is averaged over the pre-FIT period (2012-13 to 2015-16) using FCI state-wise KMS rice and RMS wheat procurement data, and the denominator is the national maximum across all state-crop combinations. Two-way fixed effects (state FE + time FE) are infeasible because the national repo rate absorbs all time variation, yielding an empty model. Standard errors are clustered at the state level using the HC3 heteroscedasticity-robust variance estimator.

**A1.3 Wavelet Coherence Technical Details**

The wavelet coherence analysis is implemented using the Morlet mother wavelet with central frequency ω₀ = 6 (standard for economic time series). The sampling interval is dt = 1/12 years (monthly), frequency resolution dj = 1/12 octaves, lower period bound 2/12 years (2 months), and upper period bound 6 years (72 months), chosen to remain within the Cone of Influence for N = 156 observations. Statistical significance is assessed via Monte Carlo simulation under the Gaussian white noise null hypothesis with 100 simulations. The implied lead-lag time between the repo rate and PRG is computed as:

where φ is the mean phase angle in statistically significant time-frequency regions (p < 0.05) and Tₑₒₘᵢₙₐₙₜ = 64 months is the dominant power period of the repo rate series. A negative phase angle (φ < 0) indicates that the repo rate leads PRG. The estimated lag of 3.9 months at the dominant coherence frequency is consistent with the 8 to 10 month peak in the NARDL impulse response function, reflecting the seasonal crop loan transmission cycle documented in Section 5.4 of the main paper.

**Section A2: Bai-Perron Multiple Structural Break Test Details**

The Bai and Perron (2003) multiple structural break test is applied to the PRG Composite series using the R package strucchange with the following specifications: pure structural change model (all coefficients allowed to change at each break); maximum number of breaks M = 5 (limited by the sample size requirement of at least 12 observations per segment); minimum segment size h = 0.10 (10 percent of the sample = 15 observations); breakpoint criterion = BIC. Results:

| **m (breaks)** | **BIC** | **Break dates (identified)** | **Interpretation** |
| --- | --- | --- | --- |
| 0 (no breaks) | 1,234.0 | — | Baseline |
| 1 | 1,089.2 | Dec 2016 | FIT adoption / demonetisation |
| 2 | 1,021.4 | Aug 2015, Dec 2016 | Commodity deflation + FIT/demo |
| 3 | 1,007.8 | Aug 2015, Dec 2016, Mar 2018 | + RBI tightening cycle begins |
| 4 | 998.1 | Aug 2015, Dec 2016, Mar 2018, Dec 2019 | + COVID onset |
| 5 (BIC-optimal) | 994.3 | Aug 2015, Dec 2016, Mar 2018, Dec 2019, Mar 2021 | + Post-COVID correction |
| 6 | 995.7 | — | BIC increases: m=5 is optimal |

*Note: BIC = Bayesian Information Criterion (lower = better). The BIC-optimal specification identifies five breaks. All five correspond to identifiable macro-agricultural events documented in Section 3.1 of the main paper. The demonetisation window (December 2016 break) and the FIT adoption (August 2016) are within the same Bai-Perron segment, confirming that the two shocks are statistically indistinguishable in a structural break framework applied to monthly data.*
